# Supplementary material for: One-pot synthesis and characterizations of bi-functional phosphor–magnetic @SiO2 nanoparticles: controlled and structured association of Mo6 cluster units and γ-Fe2O3 nanocrystals
Source: Royal Society of Chemistry journal article supplement (doi:10.1039/b806919k), 2008-01-01
Supplement: b806919k.pdf [file b806919k.pdf]

## Supplementary Information

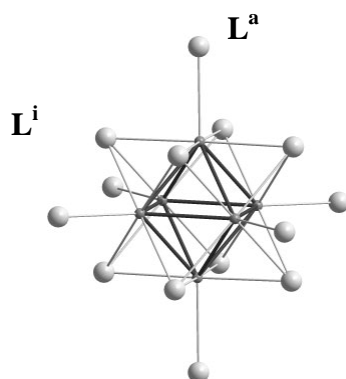

**S1:** Representation of the  $\text{Mo}_6\text{L}_8\text{L}^{\text{a}}_6$  units.

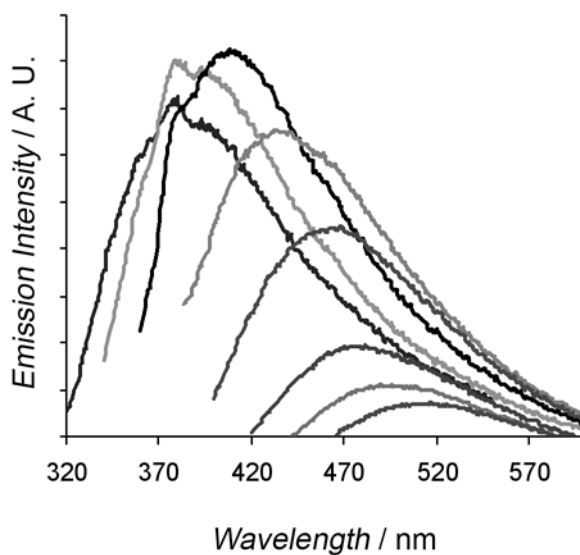

**S2:** Luminescence spectra of hollow silica nanoparticles. From left to right:  $\lambda_{\text{exc}} = 300$  nm, 320 nm, 340 nm, 360 nm, 380 nm, 400 nm, 420 nm, 440 nm.

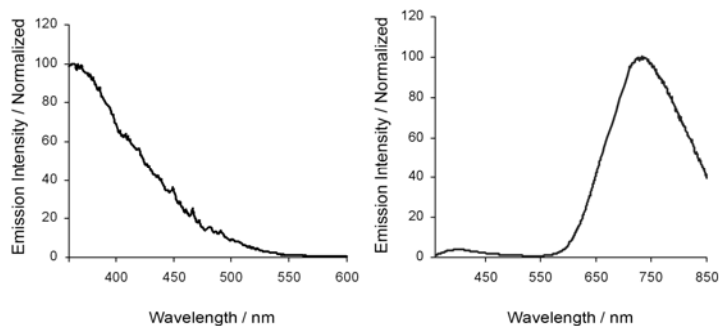

**S3:** Solid state excitation spectrum (a) ( $\lambda_{\text{obs}} = 680$  nm) and emission spectrum (b) ( $\lambda_{\text{exc}} = 340$  nm) of  $\text{Cs}_2\text{Mo}_6\text{Br}_{14} \cdot \gamma\text{Fe}_2\text{O}_3 @ \text{SiO}_2$ .

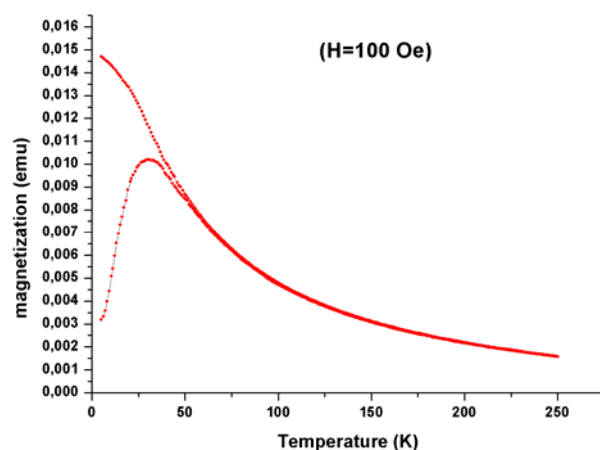

**S4:** Magnetization curves of  $\gamma\text{-Fe}_2\text{O}_3\text{-Cs}_2\text{Mo}_6\text{Br}_{14}@\text{SiO}_2$ . Magnetic characterization was performed using a superconducting quantum interference device (SQUID). Zero-field-cooled (ZFC) and field-cooled (FC) magnetization curves were obtained under an applied field of 100 Oe from 5 K to 250 K.

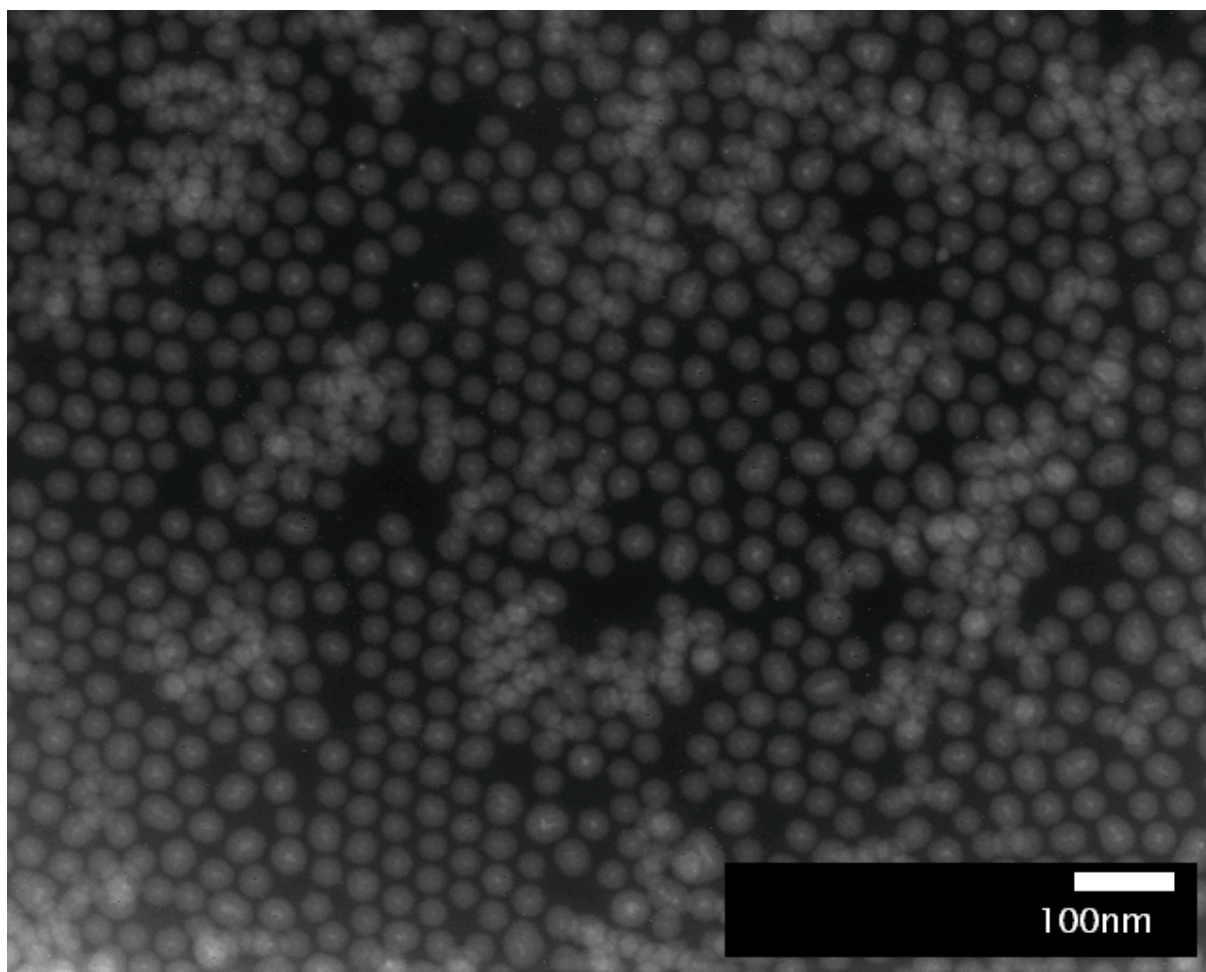

**S5:** Figure 2a at a larger scale.

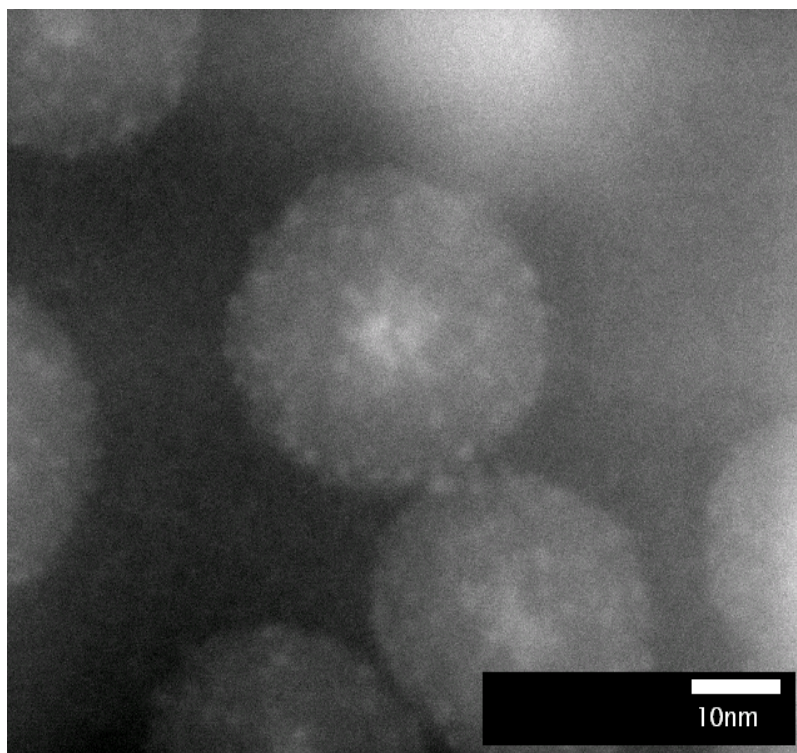

**S5:** Figure 2b at a larger scale.

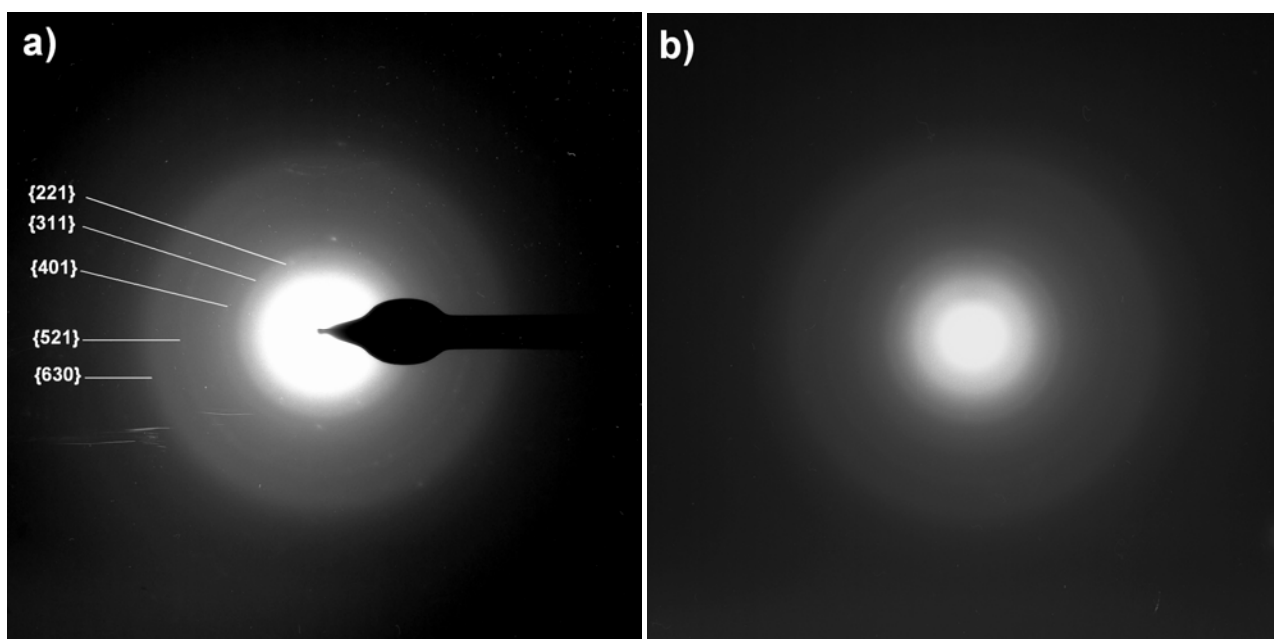

**S6:** Electron diffraction patterns with two different illumination conditions in order to visualize outer diffraction rings (a) and inner diffraction rings (b). Indexation is in agreement with  $\gamma\text{-Fe}_2\text{O}_3$  structure.
